# Supplementary material for: Grazing and Recovery of Kelp Gametophytes Under Ocean Warming
Source: Frontiers journal article supplement (doi:10.3389/fmars.2022.866136), 2022-04-20
Supplement: Data_Sheet_1.docx [file Data_Sheet_1.docx]

Supplementary Material

## Supplementary Figures

Table 1. Summary table of 2-factor ANOVA of total mean coverage of gametophytes (µm2), and abundance with grazing and temperature as fixed factors. Significant results at P < 0.05 are printed in bold.

| Variable | Factor | df | SS | MS | F | P-value |
| --- | --- | --- | --- | --- | --- | --- |
| Mean coverage (µm2) | Grazer | 1 | 1.313 | 1.3130 | 5.969 | **0.0227** |
| Temperature | 2 | 0.864 | 0.4321 | 1.964 | 0.1631 |
| Grazer x Temperature | 2 | 0.581 | 0.2903 | 1.320 | 0.2867 |
| Residual | 23 | 5.059 | 0.2200 |  |  |
| Abundance | Grazer | 1 | 1.222 | 1.1219 | 7.101 | **0.0138** |
| Temperature | 2 | 0.158 | 0.0790 | 0.500 | 0.6129 |
| Grazer x Temperature | 2 | 0.030 | 0.0152 | 0.096 | 0.9087 |
| Residual | 23 | 3.634 | 0.1580 |  |  |

Table 2. Summary table of 3-factor ANOVA of total mean coverage of gametophytes (µm2), mean length (µm) and abundance with grazing, time, and temperature as fixed factors. Significant results are printed in bold.

| Variable | Factor | df | SS | MS | F | P-value | Post-hoc |
| --- | --- | --- | --- | --- | --- | --- | --- |
| Mean coverage (µm2) | Grazer | 1 | 3.119 | 3.1195 | 13.737 | **0.0004** |  |
| Time | 2 | 1.0581 | 1.0581 | 4.660 | **0.0125** | Day 7 = Day 14 > Day 18 |
| Temperature | 2 | 0.8079 | 0.8079 | 3.558 | **0.0336** | 26˚C < 23˚C |
| Grazer x Time | 2 | 0.1189 | 0.1189 | 0.524 | 0.594 |  |
| Grazer x Temperature | 2 | 0.0842 | 0.0842 | 0.371 | 0.691 |  |
| Time x Temperature | 4 | 0.1265 | 0.1265 | 0.557 | 0.694 |  |
| Grazer x Time x Temperature | 4 | 0.1148 | 0.1148 | 0.505 | 0.731 |  |
| Residual | 71 | 16.123 | 0.2271 |  |  |  |
| Mean length (µm) | Grazer | 1 | 0.301 | 0.3011 | 5.010 | **0.028** |  |
| Time | 2 | 1.123 | 0.5614 | 9.340 | **0.0002** | Day 7 = Day 14 > Day 18 |
| Temperature | 2 | 0.496 | 0.2482 | 4.130 | **0.020** | 23˚C > 26˚C = 20˚C |
| Grazer x Time | 2 | 0.045 | 0.0227 | 0.377 | 0.687 |  |
| Grazer x Temperature | 2 | 0.017 | 0.0086 | 0.143 | 0.866 |  |
| Time x Temperature | 4 | 0.061 | 0.0153 | 0.255 | 0.905 |  |
| Grazer x Time x Temperature | 4 | 0.139 | 0.0349 | 0.580 | 0.678 |  |
| Residual | 71 | 4.267 | 0.0601 |  |  |  |
| Abundance | Grazer | 1 | 3.214 | 3.214 | 22.254 | **1.16e-05** |  |
| Time | 2 | 2.157 | 1.078 | 7.468 | **0.001** | Day 7 < Day 18 |
| Temperature | 2 | 0.175 | 0.087 | 0.606 | 0.548 |  |
| Grazer x Time | 2 | 0.090 | 0.045 | 0.311 | 0.733 |  |
| Grazer x Temperature | 2 | 0.029 | 0.015 | 0.102 | 0.903 |  |
| Time x Temperature | 4 | 0.314 | 0.078 | 0.543 | 0.704 |  |
| Grazer x Time x Temperature | 4 | 0.220 | 0.055 | 0.382 | 0.821 |  |
| Residual | 71 | 10.253 | 0.144 |  |  |  |
